# Supplementary material for: Game-related assessments for personnel selection: A systematic review
Source: Frontiers journal article supplement (doi:10.3389/fpsyg.2022.952002), 2022-09-28
Supplement: Presentation_3.pdf [file Presentation_3.pdf]

## *Supplementary Material - 3*

**Supplementary Table S1.** Description of reviewed empirical studies

| Study                          | Design | Participants |                                                                                                                 | GBA                                                                                                                                    |          |                                                                                     |                                                                                                                                                            |
|--------------------------------|--------|--------------|-----------------------------------------------------------------------------------------------------------------|----------------------------------------------------------------------------------------------------------------------------------------|----------|-------------------------------------------------------------------------------------|------------------------------------------------------------------------------------------------------------------------------------------------------------|
|                                |        | Size (%F)    | Features                                                                                                        | Name                                                                                                                                   | Type     | GBA measures                                                                        | Other measures                                                                                                                                             |
| Albadán et al. (2016)          | CS     | ~50 (NR)     | Professionals and university students                                                                           | Unnamed                                                                                                                                | SGAD     | Competences (dynamism, planning, integrity, self-control, conviction, perseverance) | -                                                                                                                                                          |
| Albadán et al. (2018)          | CS     | ~50 (NR)     | Professionals and university students                                                                           | Unnamed                                                                                                                                | Otros/NA | Competences (dynamism, planning, integrity, self-control, conviction, perseverance) | -                                                                                                                                                          |
| al-Qallawi and Raghavan (2022) | CS     | -            | 3146 user reviews                                                                                               | Thrive @ Sopra Steria<br>PwC Career Unlocked<br>Amazing Insights<br>Cosmic Cadet<br>KMPG Ready<br>Nautics<br>Skyrise City<br>Scoutible | Otros/NA | Not applicable                                                                      | Sentiment<br>Emotions                                                                                                                                      |
| Auer et al. (2022)             | CS     | 621 (57.8%)  | Undergraduate students ( $M_{age} = 23.34$ years, 42.5% European American or white, 10.3% full-time employment) | Cognify                                                                                                                                | Otros/NA | Game performance<br>Game events<br>Mouse positions<br>Trace data modeling           | CA - Fluid reasoning<br>CA - Processing speed<br>CA - Quantitative knowledge<br>CA - Verbal ability<br>CA - Virtual processing<br>Conscientiousness<br>GPA |

| Study                       | Design | Participants |                                                                                                                       | GBA            |          |                     | Other measures                                                                                                                                                                                         |
|-----------------------------|--------|--------------|-----------------------------------------------------------------------------------------------------------------------|----------------|----------|---------------------|--------------------------------------------------------------------------------------------------------------------------------------------------------------------------------------------------------|
|                             |        | Size (%F)    | Features                                                                                                              | Name           | Type     | GBA measures        |                                                                                                                                                                                                        |
| Balcerak and Woźniak (2021) | CS     | 833 (60.5%)  | $M_{\text{age}} = 32.6$ years, 17.5% students                                                                         | Not applicable | Otros/NA | Not applicable      | Process favorability<br>Procedural justice                                                                                                                                                             |
| Brown et al. (2022)         | CS     | 548 (82.0%)  | Undergraduate students (38% White, 95% born in an English-speaking country, 94% identify as a native English speaker) | Shapes test    | SGAG     | Social intelligence | Social intelligence<br>Scholastic Aptitude Test /<br>American College Testing                                                                                                                          |
| Buil et al. (2020)          | CS     | 239 (31.0%)  | $M_{\text{age}} = 22.35$ years                                                                                        | EY Challenge   | SGAG     | Game score          | Perception of competence<br>Autonomy<br>Intrinsic motivation<br>Perceived ease of use<br>Perceived usefulness<br>Attitude<br>Satisfaction<br>Recommendation intention<br>Organizational attractiveness |
| Collmus and Landers (2019)  | CS     | 659 (51.9%)  | 78.6% European American or White, 67.7% full-time employent                                                           | Not applicable | TA       | Not applicable      | CA - Three-dimensional rotation<br>CA - Letter and number series<br>CA - Matrix reasoning<br>CA - Progressive matrices<br>CA - Verbal reasoning<br>Time length<br>Applicant perceptions                |

| Study                 | Design | Participants |                                                                                                                        | GBA                                                                   |                              |                                                                                                                                                                      |                                                                                      |
|-----------------------|--------|--------------|------------------------------------------------------------------------------------------------------------------------|-----------------------------------------------------------------------|------------------------------|----------------------------------------------------------------------------------------------------------------------------------------------------------------------|--------------------------------------------------------------------------------------|
|                       |        | Size (%F)    | Features                                                                                                               | Name                                                                  | Type                         | GBA measures                                                                                                                                                         | Other measures                                                                       |
| Egol et al. (2017)    | CS     | 120 (NR)     | -                                                                                                                      | Unnamed                                                               | SGAD                         | Heuristic flexibility<br>Social perception<br>Attentiveness<br>Processing speed<br>Memory<br>Adaptive and context dependent processing speed<br>Adaptive flexibility | Score in ABOS examination<br>Score in OITE examination<br>Score in USMLE examination |
| Ellison et al. (2020) | CS     | 347 (58.8%)  | MTurk participants ( $M_{age} = 35.68$ years, 63.5% Caucasian, 64.2% United States, 35.6% 2+ years of work experience) | gridChallenge<br>motionChallenge<br>digitChallenge<br>switchChallenge | SGAG<br>SGAG<br>SGAG<br>SGAG | Working memory<br>Complex planning capability<br>Basic numerical comprehension<br>Deductive logical reasoning test                                                   | Applicant reactions                                                                  |
| Formica et al. (2017) | CS     | 981 (60.0%)  | $M_{age} = 23.0$ years, 58% are gamers (62% casual gamers)                                                             | Not applicable                                                        | Otros/NA                     | Not applicable                                                                                                                                                       | Game mechanics checklist<br>Big Five personality                                     |

| Study                       | Design | Participants |                                                                                                            | GBA   |      |                                                                          |                                                                                                                                                                                                               |
|-----------------------------|--------|--------------|------------------------------------------------------------------------------------------------------------|-------|------|--------------------------------------------------------------------------|---------------------------------------------------------------------------------------------------------------------------------------------------------------------------------------------------------------|
|                             |        | Size (%F)    | Features                                                                                                   | Name  | Type | GBA measures                                                             | Other measures                                                                                                                                                                                                |
| Georgiou (2021)             | EX     | 103 (55.3%)  | $M_{\text{age}} = 35.00$ years,<br>$M_{\text{job experience}} = 12.00$ years, 42.8% had a master degree    | Owiwi | SGAG | Competences (adaptability, resilience, flexibility, and decision-making) | Ease of faking<br>Opportunity to perform<br>Job-relatedness<br>Organizational attractiveness<br>Video game experience                                                                                         |
|                             | EX     | 186 (54.0%)  | $M_{\text{age}} = 30.04$ years,<br>$M_{\text{job experience}} = 6.93$ years, 52.0% had a bachelor degree   | Owiwi | SGAG | Competences (adaptability, resilience, flexibility, and decision-making) | Ease of faking<br>Opportunity to perform<br>Job-relatedness<br>Organizational attractiveness<br>Video game experience<br><br>Test-taking motivation<br>Recommendation intentions<br>Job acceptance intentions |
| Georgiou and Lievens (2022) | LO     | 100 (53.0%)  | $M_{\text{age}} = 31.77$ years,<br>$M_{\text{job experience}} = 8.21$ years, 50% had a high school degree. | Owiwi | SGAG | Competences (adaptability, resilience, flexibility, and decision-making) | Perceived enjoyment<br>Flow<br>Organizational innovativeness and competence<br>Organizational attractiveness                                                                                                  |
|                             | EX     | 103 (55.0%)  | $M_{\text{age}} = 35.88$ years,<br>$M_{\text{job experience}} = 12.00$ years, 45% had a bachelor degree.   | Owiwi | SGAG | Competences (adaptability, resilience, flexibility, and decision-making) | Perceived enjoyment<br>Flow<br>Organizational innovativeness and competence<br>Organizational attractiveness                                                                                                  |

| Study                        | Design | Participants |                                                                          | GBA                       |              |                                                                          |                                                                                                                                        |
|------------------------------|--------|--------------|--------------------------------------------------------------------------|---------------------------|--------------|--------------------------------------------------------------------------|----------------------------------------------------------------------------------------------------------------------------------------|
|                              |        | Size (%F)    | Features                                                                 | Name                      | Type         | GBA measures                                                             | Other measures                                                                                                                         |
| Georgiou and Nikolaou (2020) | EX     | 154 (45.5%)  | Employees ( $M_{age} = 29.96$ years, 47.7% university graduates)         | Owiwi                     | SGAG         | Competences (adaptability, resilience, flexibility, and decision-making) | Perceived fairness<br>Perceived predictive validity<br>Process satisfaction<br>Organizational attractiveness<br>Openness to experience |
|                              | CS     | 131 (65.0%)  | University students and alumni ( $M_{age} = 26.0$ years)                 |                           |              |                                                                          |                                                                                                                                        |
| Georgiou et al. (2019)       | CS     | 20 (NR)      | HR professionals                                                         | Owiwi                     | SGAG         | Competences (adaptability, resilience, flexibility, and decision-making) | -                                                                                                                                      |
|                              |        | 321 (61.0%)  | Business schools' students and graduates ( $M_{age} = 26.5$ years)       |                           |              |                                                                          |                                                                                                                                        |
|                              |        | 410 (46.0%)  | Job seekers ( $M_{age} = 29.0$ years, 72% bachelor's or master's degree) |                           |              |                                                                          |                                                                                                                                        |
| Gkorezis et al. (2021)       | EX     | 161 (44.1%)  | Employees in a multinational information technology company              | Owiwi                     | SGAG         | Competences (adaptability, resilience, flexibility, and decision-making) | Organizational attractiveness<br>Recommendations intentions<br>Video game experience                                                   |
| Harman and Brown (2022)      | EX     | 343 (58.0%)  | 75% White or Caucasian, 76.4% college education or more                  | GPM-nl<br>GPM-illustrated | SGAG<br>SGAG | Big Five personality                                                     | Big Five personality<br>Applicant reactions                                                                                            |

| Study                      | Design | Participants |                                                                                                                    | GBA                        |      |                                              |                                                                                                                                                                                                              |
|----------------------------|--------|--------------|--------------------------------------------------------------------------------------------------------------------|----------------------------|------|----------------------------------------------|--------------------------------------------------------------------------------------------------------------------------------------------------------------------------------------------------------------|
|                            |        | Size (%F)    | Features                                                                                                           | Name                       | Type | GBA measures                                 | Other measures                                                                                                                                                                                               |
| Hilliard et al. (2022)     | CS     | 300 (69.0%)  | Prolific Academic participants ( $M_{\text{age}} = 31.14$ years)                                                   | Unnamed                    | SGAD | Big Five personality                         | Big Five personality                                                                                                                                                                                         |
|                            |        | 431 (NR)     | Prolific Academic participants ( $M_{\text{age}} = 40.0$ years, 48.5% White)                                       |                            |      |                                              |                                                                                                                                                                                                              |
| Hommel et al. (2022)       | CS     | 180 (68.3%)  | $M_{\text{age}} = 27.2$ years, 80.6% students                                                                      | Gamified Set-Shifting Task | SGAG | Cognitive flexibility                        | Cognitive flexibility<br>Cognitive ability<br>Acceptance of the assessment methods<br>Adaptability<br>Academic performance<br>Experience with original test<br>Computer experience<br>Online game experience |
| Landers and Collmus (2022) | CS     | 352 (79.0%)  | Undergraduate psychology students ( $M_{\text{age}} = 23.9$ years, 49.6% White, 62.21% working at least part-time) | Unnamed                    | SGAG | Personality (conscientiousness and openness) | Personality (conscientiousness and openness)<br>Applicant reactions<br>Academic performance                                                                                                                  |

| Study                   | Design | Participants  |                                                                                                                                             | GBA                                |      |                                                |                                                                                                                                                                                           |
|-------------------------|--------|---------------|---------------------------------------------------------------------------------------------------------------------------------------------|------------------------------------|------|------------------------------------------------|-------------------------------------------------------------------------------------------------------------------------------------------------------------------------------------------|
|                         |        | Size (%F)     | Features                                                                                                                                    | Name                               | Type | GBA measures                                   | Other measures                                                                                                                                                                            |
| Landers et al. (2020)   | EX     | 240 (43.8%)   | MTurk participants ( $M_{age}$ =36.63 years, 86.6% were employed)                                                                           | Unnamed situational-judgement test | SGAG | Self-management skills<br>Interpersonal skills | CA – Numerical reasoning<br>CA – Verbal reasoning<br>Personality (Conscientiousness)<br>Applicant reactions<br>Procedural justice<br>Distal organizational attitudes<br>Conscientiousness |
| Landers et al. (2021)   | CS     | 633 (57.7%)   | Undergraduate students ( $M_{age}$ =21.35 years, 42.0% European American or White, 53.9% working at least part-time)                        | Numbubbles                         | SGAD | Cognitive ability                              | CA – Visual processing                                                                                                                                                                    |
|                         |        |               |                                                                                                                                             | Resemble                           | SGAD |                                                | CA – Fluid reasoning                                                                                                                                                                      |
|                         |        |               |                                                                                                                                             | Grid Lock                          | SGAD |                                                | CA – Processing speed                                                                                                                                                                     |
|                         |        |               |                                                                                                                                             | Proof It                           | SGAD |                                                | CA – Quantitative ability                                                                                                                                                                 |
|                         |        |               |                                                                                                                                             | Tally Up                           | SGAD |                                                | CA – Verbal ability                                                                                                                                                                       |
|                         |        |               |                                                                                                                                             | Colour Pop                         | SGAD |                                                | Motivational outcomes                                                                                                                                                                     |
|                         |        |               |                                                                                                                                             | Short Cuts                         | SGAD |                                                | Attitudinal outcomes                                                                                                                                                                      |
| Laumer et al. (2012)    | CS     | 127 (59.3%)   | Employees ( $M_{age}$ =24.7 years, $M_{organizational\ tenure}$ =1.82 years)                                                                |                                    |      |                                                | Academic performance<br>Supervisor ratings                                                                                                                                                |
|                         |        | 1,882 (56.4%) | Jobseekers (37.8% students)                                                                                                                 | Not applicable                     | SGAG | Not applicable                                 | Perceived selection fairness<br>Perceived privacy security<br>Perceived enjoyment<br>Perceived usefulness<br>Perceived ease of use<br>Intention to use self-assessments                   |
| McChesney et al. (2022) | CS     | 277 (NR)      | MTurk participants ( $M_{age}$ =36.0 years, 65.0% Caucasian/White, 85% reported having looked for a job online at some point of their life) | Not applicable                     | TA   | Not applicable                                 | Perception of the organization (organizational innovation, organizational attraction)<br>Openness to experience<br>Propensity to innovation                                               |

| Study                     | Design | Participants  |                                                                                    | GBA                       |      |                                                                          |                                                                                                                                     |
|---------------------------|--------|---------------|------------------------------------------------------------------------------------|---------------------------|------|--------------------------------------------------------------------------|-------------------------------------------------------------------------------------------------------------------------------------|
|                           |        | Size (%F)     | Features                                                                           | Name                      | Type | GBA measures                                                             | Other measures                                                                                                                      |
| Melchers and Basch (2022) | CS     | 1,071 (32.6%) | Applicants ( $M_{age} = 34.0$ years)                                               | Unnamed                   | SGAD | GBA score                                                                | Assessment center performance                                                                                                       |
| Nikolaou et al. (2019)    | CS     | 120 (64.0%)   | University students and alumni ( $M_{age} = 26.0$ years, 55.0% currently employed) | Owiwi                     | SGAG | Competences (adaptability, resilience, flexibility, and decision-making) | Cognitive ability<br>Big Five personality<br>Overall job performance<br>Academic performance<br>Organizational citizenship behavior |
| Sanchez et al. (2022)     | CS     | 112 (69.0%)   | Undergraduate and graduate students ( $M_{age} = 24.0$ , 38% Latino)               | Project M                 | PG   | Emotional intelligence                                                   | Video game pursuit<br>Intimidation with games<br>Emotional intelligence<br>Big Five personality                                     |
|                           |        | 100 (66.0%)   | Undergraduate and graduate students ( $M_{age} = 24.0$ , 38% Latino)               | Richie's Plank Experience | PG   | Sensation seeking<br>Heights aversion                                    | Sensation seeking<br>Height aversion                                                                                                |
|                           |        | 105 (79.0%)   | University students ( $M_{age} = 23.0$ , 35% Hispanic)                             | Balloon Pop               | PG   | Risk taking                                                              | Impulsiveness<br>Risk taking<br>Big Five personality                                                                                |



| Study                 | Design | Participants |                                                                    | GBA          |      |                                                                                  |                                                                                       |
|-----------------------|--------|--------------|--------------------------------------------------------------------|--------------|------|----------------------------------------------------------------------------------|---------------------------------------------------------------------------------------|
|                       |        | Size (%F)    | Features                                                           | Name         | Type | GBA measures                                                                     | Other measures                                                                        |
| Wiernik et al. (2022) | CS     | 466 (46.8%)  | MTurk participants (74.5% White, 43.1% Bachelor's degree)          | Virus Slayer | SGAD | Analytical thinking                                                              | -                                                                                     |
|                       |        | 173 (39.3%)  | MTurk participants (70.5% White, 52.0% has some college education) |              |      | Active learning                                                                  |                                                                                       |
|                       |        | 156 (32.5%)  | MTurk participants (48.0% Hispanic, 48.1% Bachelor's degree)       |              |      | Deductive reasoning<br>Systems thinking<br>Adaptability<br>Situational awareness |                                                                                       |
| Wu et al. (2022)      | CS     | 565 (52.7%)  | Psychology students ( $M_{age}$ =20.1, 33.1% White)                | Click Town   | SGAD | Conscientiousness (achievement striving, self-discipline, and cautiousness)      | Big Five personality<br>Goal orientation<br>Cognitive ability<br>Game-play experience |
|                       |        |              |                                                                    | Word Find    | SGAD |                                                                                  |                                                                                       |

*Note.* CS – Cross sectional study; EX – Experimental study; LO – Longitudinal study; NR – Non-reported; TA – Traditional assessment; SGAG – Serious game created by assessment gamification; SGAD –Serious game created by assessment gameful design; PG – Playful game; CA – Cognitive ability.
